# Supplementary material
Source: Springer Nature journal article supplement (https://www.springermedizin.de/resource/supplementary/12936_2011_1695_MOESM2_ESM.pdf/9542382)

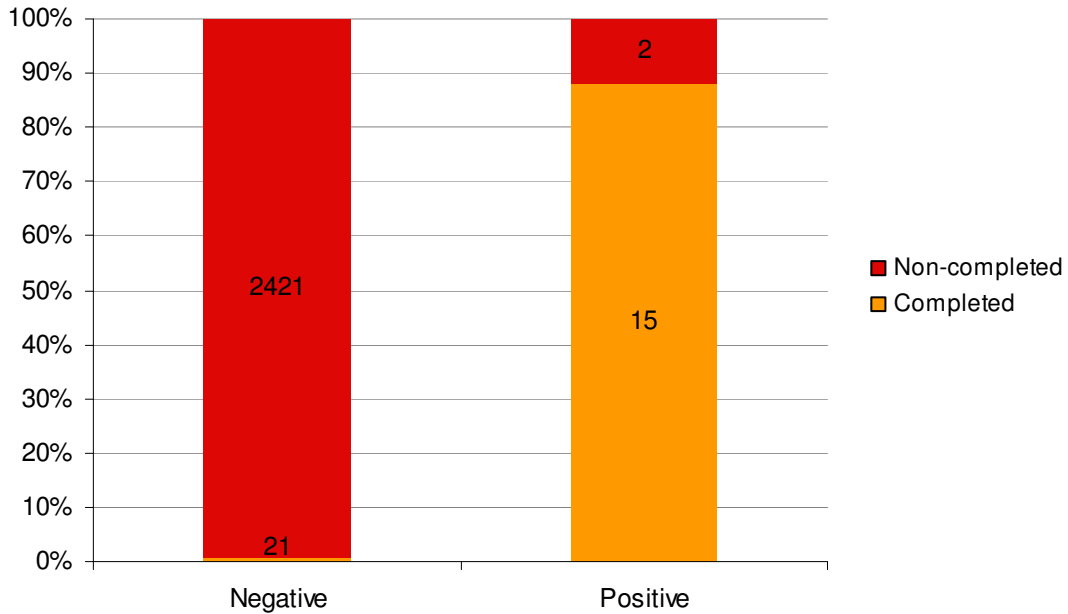

Supplement: MOESM2 [file 9542382]
